# Supplementary material for: Participatory mental health interventions in low-income and middle-income countries: a realist review protocol
Source: HighWire-hosted journal article supplement (doi:10.1136/bmjopen-2021-057530), 2022-04-01
Supplement: bmjopen-2021-057530supp001_data_supplement.pdf [file bmjopen-2021-057530supp001_data_supplement.pdf]

**Draper et al. (2010)** Continuum of process scores of participation, across discrete categories: leadership, planning/ management, women's empowerment, external support, M&E

**Hickey & Kipping (1998)** Mental health participation continuum (consumerist-democratisation) - information, consultation, partnership, user control

**Farmer (2017)** Community participation is "collective action to influence outcomes" (communities of interest / communities of place). Co-production, involvement, engagement, partnership, citizen influence, empowerment, consumer, public. Typology for service developers. Typologies—who, means, outcomes, outcome indicators. What is done, power / civic element.

**Pretty (1995)** Participation as opportunities for the poor / vulnerable to express self and gain benefits. 7 stages: *manipulative to self-mobilization*. Aimed at those using participatory approaches.

**Farrington and Bebbington (1993)** Breath/depth. **Deep** = involved at all stages including design / identification of problem, to decisions. **Wide (vs. narrow)** = range of different participants from the community, representative

**Continuums**

**Rifkin & Kangere (2002)** (Chilaku, 2005 who added a 'process score' mean): "active involvement in decision making and accountability for programmes". Form and process of 'participation'. Spider diagram 1-5 "participation" in: needs assessment, leadership, organisation, resource mobilisation, management.

**Zakus & Lyzack (1998)** 'Participation' difficult to translate to real practice. Process-based, contextual, political, communities as power-based and dynamic.

**Arnstein (1969)** Ladder of citizen participation ('power-over' relationship), 8 steps from *manipulation* to *citizen control*. Participation as involvement in developing plans and programs. Participation = power, those excluded from political / economic processes to be included in the future.

**Ocloo & Matthews (2016)** Category / continuum based on Arnstein's ladder consultation, engagement, partnership & leadership. Policy → organisation → direct care.

**Typologies**

**Eyben (2003)** Rights-based 6 rung ladder (*instrumental participation, to participatory rights*) International development. 'Right to participation' to access other rights.

**White (1996)** Typologies of power. Dynamic and relational, based on function. **Power, interest,** participation as process and form. Power facilitated by outsiders, not created.

**Kagan et al. (2011)** community psychology. Intersecting axis: collective/individual, and directive/emancipatory. 'Utilitarian' benefits the organisation.

**Rudqvist (2002)** Participation as state engagement with citizens - *consultation, presence and representation, influence* (tangible impact on policy and service delivery)

**Political/Civic**

**Roura (2020)** Power - 'social ecology' - structural and interpersonal, dialogue, relationships. Both explicitness / subtleties of power crucial. Model of how wider political power feeds into interpersonal level.

**Wilcox (1994)** UK between power holder (state) and citizen. Ladder of stages: information, consultation, deciding together, acting together, initiatives

*Nominal:* Legitimacy for powerful, less powerful may be involved through a desire for inclusion.  
*Instrumental:* Means to an end; 'efficient' use of skills/ knowledge, costs to the community.  
*Representative:* Gives communities a voice and leverage. For outsiders, participation functions as a voice and allows sustainability.  
*Transformative:* Empowerment: alters structures that lead to marginalisation and exclusion.

Development example: **Oakley (1989)** - marginal—substantive—structural participation. Transfer of power, sustainability, self-reliance.

**Capacities and capabilities**

**Example - Cohen and Uphoff (1977)** Typologies of participation in development: 1) Contribution; 2) Organisation; 3) Empowering/transfer of power

**Goodman (1998)** community capacity : citizen participation, leadership, skills, resources, social / organisational networks, community power/ values / history, sense of community. Who does and does not participate in the community? Participation as means to empowerment.

**George (2015) review**— capacity-building, capability, empowerment, participation (no clear definition)

**WHO Alma Alta Declaration (1978)** participation "in the planning, organization, operation & evaluation" of primary healthcare. Empowerment and sustainability.

**Pragmatic**

**Crawford et al. (2002)** "[T]he active participation in the planning, monitoring and development of health services" - user involvement, client, consumer, patient, service user. HIC not LMIC

**Relational**

**Chambers (1994)** Three levels: cosmetic labelling, co-opting (local buy-in), empowering (doing for self). "Paradigm of people" vs. paradigm of things. Attitudes / behaviour of "uppers" is crucial.

**Dialogical**

**Natasi et al. (2012)** Testing acceptability of psychological interventions. Local—mutual learning, ownership, empowerment, sustainability. Local cultural context.

Example of transformative approaches to 'development' - **South Asia Perspective Network Association Wignaraja (2005)** 1) Participatory Action Research - critical dialogue with poor communities; 2) Pro-poor strategies; uncovering knowledge of the poor / social mobilisation, 'long revolution' → social transformation

**Bennetts et al. (2010)** Consumer participation, involve perspective in service planning, delivery and evaluation. Power and change. Consultation. HIC not LMIC

**Cornwall (2010)** Overview of participation. Translating 'voice' to 'influence', communities as dynamic, participation as process. Participation 'in what'? Different levels of engagement. Participation is political. Equality & justice.

**Campbell & Jovchelovitch (2000)** Transformative dialogue, participation as enactment of community (shared identity/ power/interests) - empowerment, social capital, reciprocal learning. Power needs to be legitimised by the powerful.
